# Supplementary material for: Rechargeable Co3O4 porous nanoflake carbon nanotube nanocomposite lithium-ion battery anodes with enhanced energy performances
Source: Royal Society of Chemistry journal article supplement (doi:10.1039/c5ra06642e), 2015-01-01
Supplement: c5ra06642e1.pdf [file c5ra06642e1.pdf]

## Supporting Information

### **Rechargeable $\text{Co}_3\text{O}_4$ Porous Nanoflakes Carbon Nanotube Nanocomposites**

### **Lithium-ion Battery Anodes with Enhanced Energy Performances**

Song Qiu,<sup>1</sup> Hongbo Gu,<sup>2</sup> Guixia Lu,<sup>1</sup> Jiurong Liu<sup>1,\*</sup>,  
Xiaoyu Li,<sup>1</sup> Ya Fu,<sup>1</sup> Xingru Yan,<sup>3</sup> Chenxi Hu<sup>1</sup>, Zhanhu Guo<sup>3,\*</sup>

<sup>1</sup>Key Laboratory for Liquid–Solid Structural Evolution and Processing of Materials, Ministry of Education and School of Materials Science and Engineering, Shandong University, Jinan, Shandong 250061, People's Republic of China

<sup>2</sup>Department of Chemistry, Tongji University, Shanghai, 200092, China

<sup>3</sup>Integrated Composites Lab (ICL), Department of Chemical & Biomolecular Engineering, University of Tennessee, Knoxville, TN 37996 USA

\*Corresponding author.

E-mail addresses: jrliu@sdu.edu.cn (J. Liu);

zguo10@utk.edu (Z. Guo)

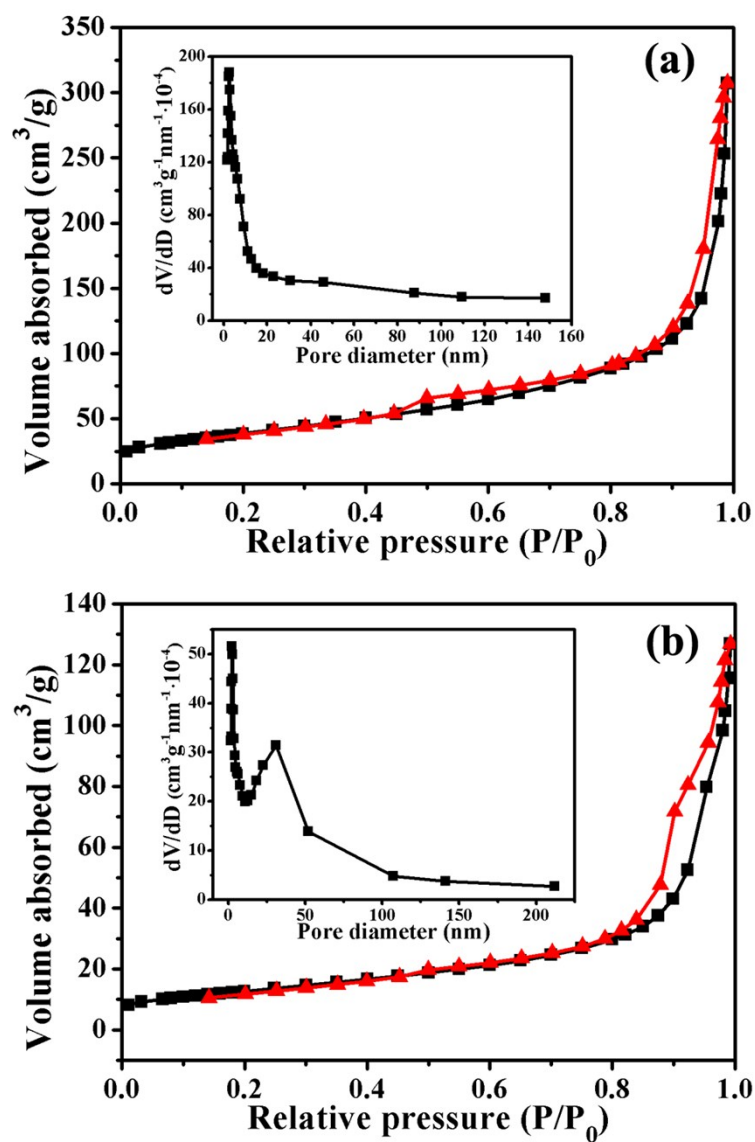

**Fig. S1**  $N_2$  adsorption-desorption isotherms of (a) pure MWNTs and (b)  $\text{Co}_3\text{O}_4/\text{MWNT}$  composites. The insets are pore size distribution curves.

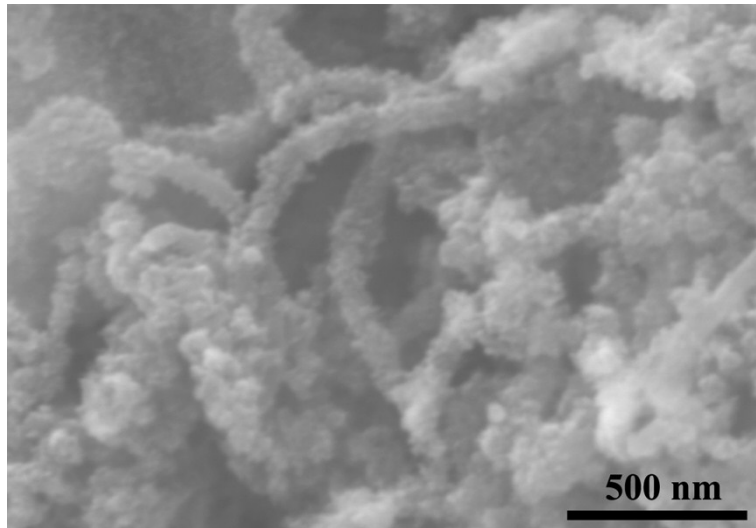

**Fig. S2** FE-SEM image of the  $\text{Co}_3\text{O}_4/\text{MWNT}$  composites after cycling.
